# Supplementary material
Source: Springer Nature journal article supplement (https://www.springermedizin.de/resource/supplementary/12957_2008_486_MOESM2_ESM.pdf/9565126)

% Survival

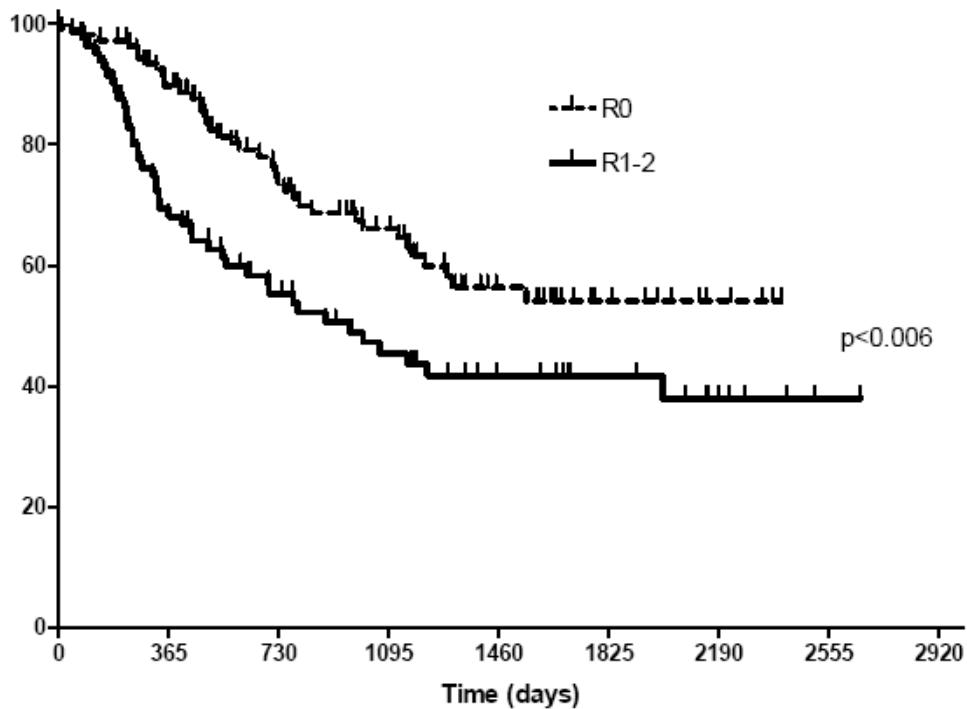

Supplement: MOESM2 [file 9565126]
